# Supplementary material for: A Phytophthora effector recruits a host cytoplasmic transacetylase into nuclear speckles to enhance plant susceptibility
Source: eLife journal article supplement (doi:10.7554/elife.40039), 2018-10-22
Supplement: supp [file elife-40039-supp-v1.zip]

Archive with 18 entries (18 files):
- elife_poa_e40039_Figure_3_figure_supplement_2.tif
- elife_poa_e40039_Figure_6_figure_supplement_1.tif
- elife_poa_e40039_Figure_4_source_data_1.xlsx
- elife_poa_e40039_Transparent_Reporting_File.pdf
- elife_poa_e40039_Figure_4_figure_supplement_1.tif
- elife_poa_e40039_Figure_2_source_data_1.xlsx
- elife_poa_e40039_Supplementary_File_1.docx
- elife_poa_e40039_Figure_3_source_data_1.xlsx
- elife_poa_e40039_Figure_2_figure_supplement_1.tif
- elife_poa_e40039_Figure_3_figure_supplement_1.tif
- elife_poa_e40039_Figure_5_source_data_1.xlsx
- elife_poa_e40039_Figure_5_figure_supplement_1.tif
- elife_poa_e40039_Figure_6_source_data_1.xlsx
- elife_poa_e40039_Figure_1_figure_supplement_1.tif
- elife_poa_e40039_Figure_2_source_data_2.xlsx
- elife_poa_e40039_Figure_6_figure_supplement_2.png
- elife_poa_e40039_Figure_2_figure_supplement_2.tif
- elife_poa_e40039_Figure_1_source_data_1.xlsx
