# Supplementary material for: A Phytophthora effector recruits a host cytoplasmic transacetylase into nuclear speckles to enhance plant susceptibility
Source: eLife journal article supplement (doi:10.7554/elife.40039), 2018-10-22
Supplement: supp [file elife-40039-supp-v1.zip › elife_poa_e40039_Figure_1_source_data_1.xlsx]

## Sheet: Sheet1
Figure 1B
	mean of relative biomass	SD
WT	0.999	0.089
CK	0.951	0.057
T33	0.598	0.041
T37	0.595	0.086
p-value(WT/CK)	0.473
p-value(WT/T33)	0.002
p-value(WT/T37)	0.004
p-value(CK/T33)	<0.001
p-value(CK/T37)	0.003
p-value(T33/T37)	0.959
Figure 1D
	mean of oospore	SD
GFP	33.2	2.928
Avh52	75.5	3.893
p-value(GFP/Avh52)	<0.001
Figure 1E
	mean of relative biomass	SD
EV	1.017	0.085
Avh52	2.531	0.127
p-value(GFP/Avh52)	<0.001
Figure 1-figure supplement 1E
	mean of diameter (cm)	SD
WT	4.64	0.167
CK	4.74	0.195
T33	4.66	0.251
T37	4.76	0.279
p-value	>0.05,no differences
