# Supplementary material for: A Phytophthora effector recruits a host cytoplasmic transacetylase into nuclear speckles to enhance plant susceptibility
Source: eLife journal article supplement (doi:10.7554/elife.40039), 2018-10-22
Supplement: supp [file elife-40039-supp-v1.zip › elife_poa_e40039_Figure_2_source_data_1.xlsx]

## Sheet: Sheet1
Identification of candidate target proteins of PsAvh52
Protein ID	Function Description	No. of unique peptide	Protein score
Glyma.18G216900.1	N-acetyltransferase activity (GNAT family)	3	31.68
Glyma.12G176500.1	LRR protein kinase	2	31.05
Glyma.09G173700.1	Monoamine-oxidase A repressor R1	3	37.13
Glyma.02G006200.1	ERF transcription factor	1	28.3
Glyma.20G178500.1	Myb-like DNA-binding domain	3	22.42
Glyma.04G052900.1	Helicase conserved C-terninal domain	2	28.96
