# Supplementary material for: A Phytophthora effector recruits a host cytoplasmic transacetylase into nuclear speckles to enhance plant susceptibility
Source: eLife journal article supplement (doi:10.7554/elife.40039), 2018-10-22
Supplement: supp [file elife-40039-supp-v1.zip › elife_poa_e40039_Figure_2_source_data_2.xlsx]

## Sheet: Sheet1
Figure 2E
	mean of oospore	SD
GFP	35	3.5
Avh52	89.9	4.6
Avh52M4	40.1	4.2
p-value(GFP/Avh52)	<0.001
p-value(GFP/Avh52M4)	0.19
p-value(Avh52/Avh52M4)	<0.001
Figure 2-figure supplement 2B
	mean of oospore	SD
GFP	40	4.3
Avh52	85	4.7
Avh52M1	35	5.8
p-value(GFP/Avh52)	<0.001
p-value(GFP/Avh52M1)	0.29
p-value(Avh52/Avh52M1)	<0.001
