# Supplementary material for: A Phytophthora effector recruits a host cytoplasmic transacetylase into nuclear speckles to enhance plant susceptibility
Source: eLife journal article supplement (doi:10.7554/elife.40039), 2018-10-22
Supplement: supp [file elife-40039-supp-v1.zip › elife_poa_e40039_Figure_3_source_data_1.xlsx]

## Sheet: Sheet1
Figure 3-figure supplement 2E
	mean of diameter (cm)	SD
GFP	1.36	0.13
GmTAP1atd	1.43	0.12
p-value	0.57
