# Supplementary material for: A Phytophthora effector recruits a host cytoplasmic transacetylase into nuclear speckles to enhance plant susceptibility
Source: eLife journal article supplement (doi:10.7554/elife.40039), 2018-10-22
Supplement: supp [file elife-40039-supp-v1.zip › elife_poa_e40039_Figure_4_source_data_1.xlsx]

## Sheet: Sheet1
Figure 4B
	mean of relative expression	SD
RNAi-EV	1.001	0.043
RNAi-GmTAP1	0.278	0.026
RNAi-EV	1.004	0.077
RNAi-GmTAP2	0.346	0.044
p-value（EV/GmTAP1）	<0.001
p-value（EV/GmTAP2）	<0.001
Figure 4C
	mean of oospore	SD
RNAi-EV	100	4.2
RNAi-GmTAPs	28.1	3.7
p-value(GFP/Avh52)	<0.001
Figure 4D
	mean of relative biomass	p-value
EV-WT	1.005	EV-WT/EV-T37	<0.001
EV-T37	0.399	EV-WT/GmTAPs-WT	<0.001
GmTAPs-WT	0.476	EV-WT/GmTAPs-T37	<0.001
GmTAPs-T37	0.409
Figure 4-figure supplement 1E
	mean of diameter (cm)
GFP	1.35	0.075
GmTAP2	1.29	0.049
p-value	0.314
