# Supplementary material for: A Phytophthora effector recruits a host cytoplasmic transacetylase into nuclear speckles to enhance plant susceptibility
Source: eLife journal article supplement (doi:10.7554/elife.40039), 2018-10-22
Supplement: supp [file elife-40039-supp-v1.zip › elife_poa_e40039_Figure_5_source_data_1.xlsx]

## Sheet: Sheet1
Figure 5B
	mean of diameter (cm)	SD
GFP	1.25	0.053
GmTAP1	1.18	0.057
NLS-GmTAP1	1.84	0.047
NES-GmTAP1	1.34	0.033
NLS-GmGmTAP1M1	1.19	0.053
p-value(GFP/GmTAP1)	0.2
p-value(GFP/NLS-GmTAP1)	<0.001
p-value(GFP/NES-GmTAP1)	0.059
p-value(GFP/NLS-GmTAP1M1)	0.218
p-value(NLS-GmTAP1/GmTAP1)	<0.001
p-value(NLS-GmTAP1/NES-GmTAP1)	<0.001
p-value(NLS-GmTAP1/NLS-GmTAP1M1)	<0.001
