# Supplementary material for: A Phytophthora effector recruits a host cytoplasmic transacetylase into nuclear speckles to enhance plant susceptibility
Source: eLife journal article supplement (doi:10.7554/elife.40039), 2018-10-22
Supplement: supp [file elife-40039-supp-v1.zip › elife_poa_e40039_Figure_6_source_data_1.xlsx]

## Sheet: Sheet1
Figure 6C
	Fold-change
	Avh52/EV	RNAi-EV/GmTAPs
MtN3	2.95	16.37
PG	1.84	7.01
LOX-1	1.91	8.01
LOX-2	1.48	1.58
UBQ5	1	0.92
	*p<0.05, **p<0.01,Student’s t test
Figure 6D
	Fold-change (UBQ5 as control)
	H3K9Ac	H2AK5Ac
MtN3	10.57	3.89
PG	11.09	15.08
LOX-1	4.43	11.31
LOX-2	4.37	4.76
*p<0.05, **p<0.01,Student’s t test
Figure 6-figure supplement 2
	Fold-change
	Avh52/EV	RNAi-GmTAPs/EV
PGIP	0.752	2.74
HSP20-1	2.106	1.115
HSP20-2	1.119	0.835
NAC-1	2.235	0.868
NAC-2	0.548	0.64
WRKY33	0.818	1.267
WRKY41	1.459	0.793
MAPKKK14-2	0.565	1.097
MAPKKK18	0.973	1.711
UBQ5	0.912	1.031
*p < 0.05,Student’s t test
