# Supplementary figures and images for: A Phytophthora effector recruits a host cytoplasmic transacetylase into nuclear speckles to enhance plant susceptibility
Source: eLife journal article supplement (doi:10.7554/elife.40039), 2018-10-22

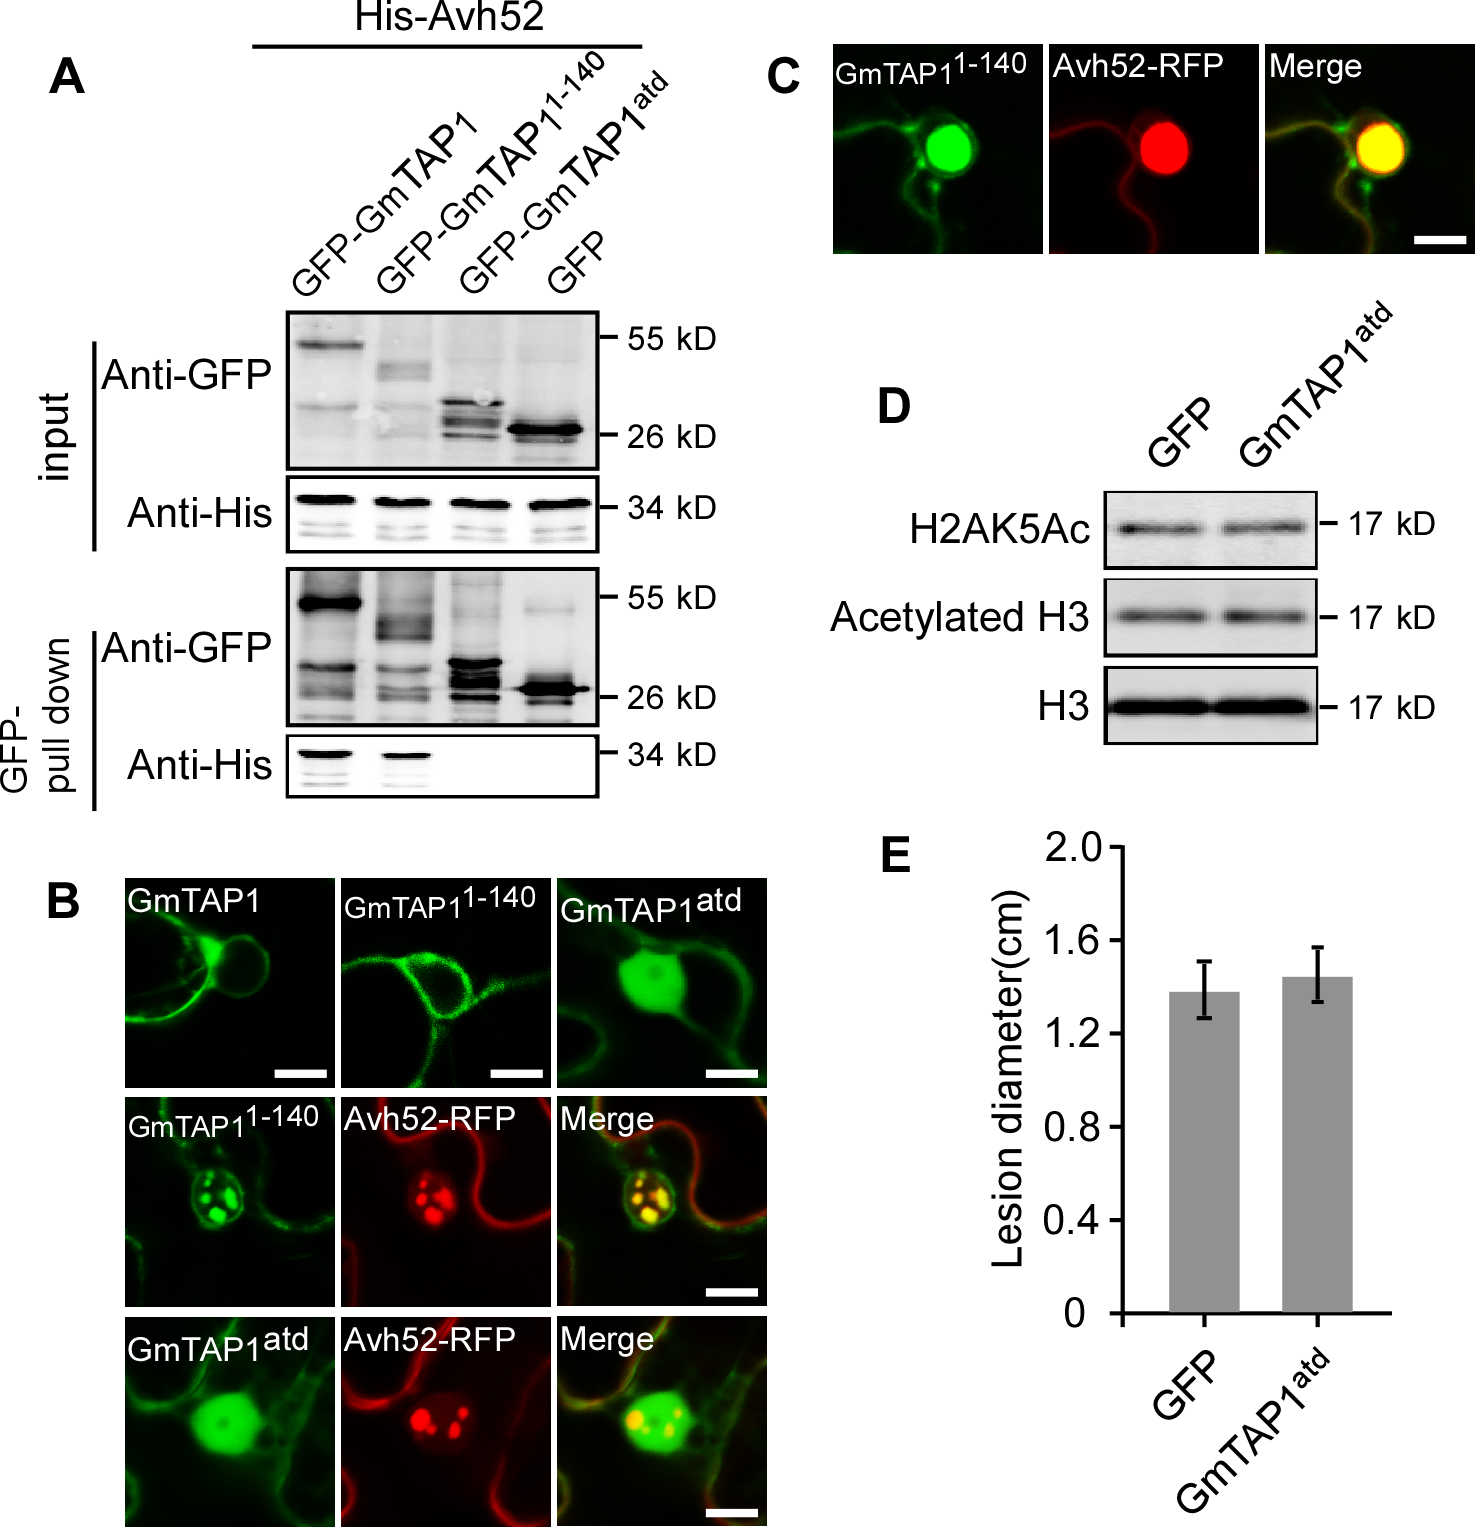

Supplement: supp [file elife-40039-supp-v1.zip › elife_poa_e40039_Figure_3_figure_supplement_2.tif]

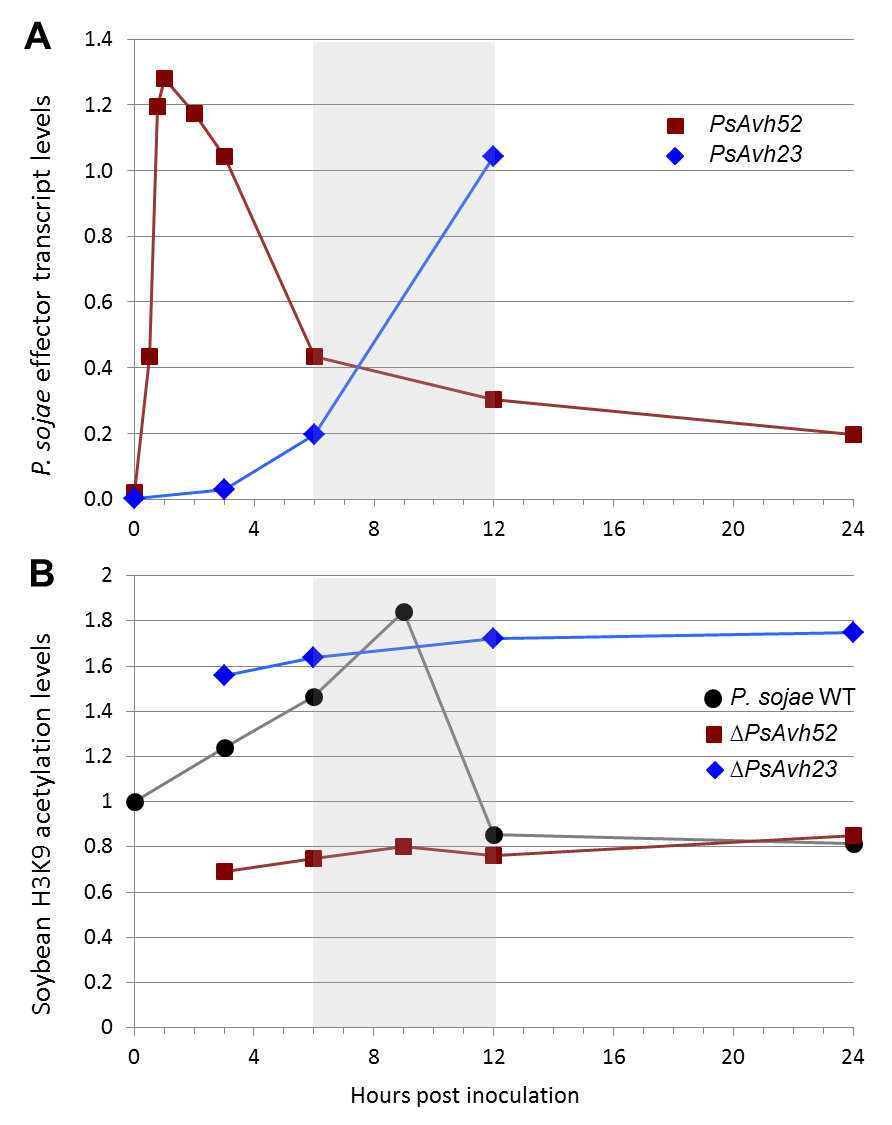

Supplement: supp [file elife-40039-supp-v1.zip › elife_poa_e40039_Figure_6_figure_supplement_1.tif]

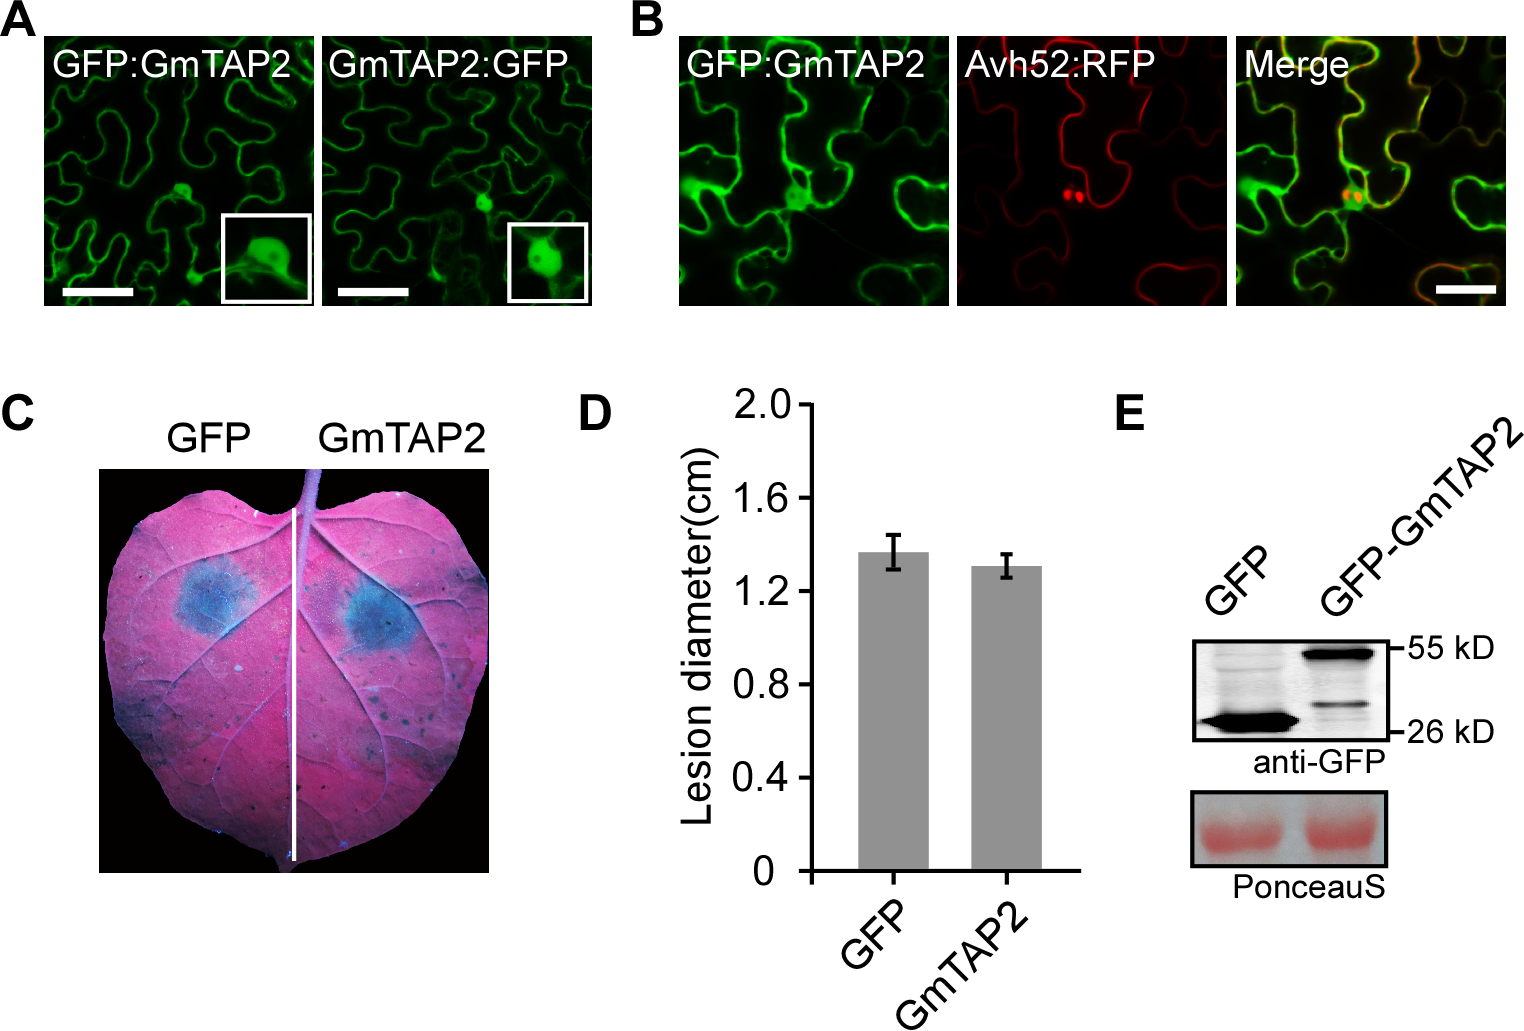

Supplement: supp [file elife-40039-supp-v1.zip › elife_poa_e40039_Figure_4_figure_supplement_1.tif]

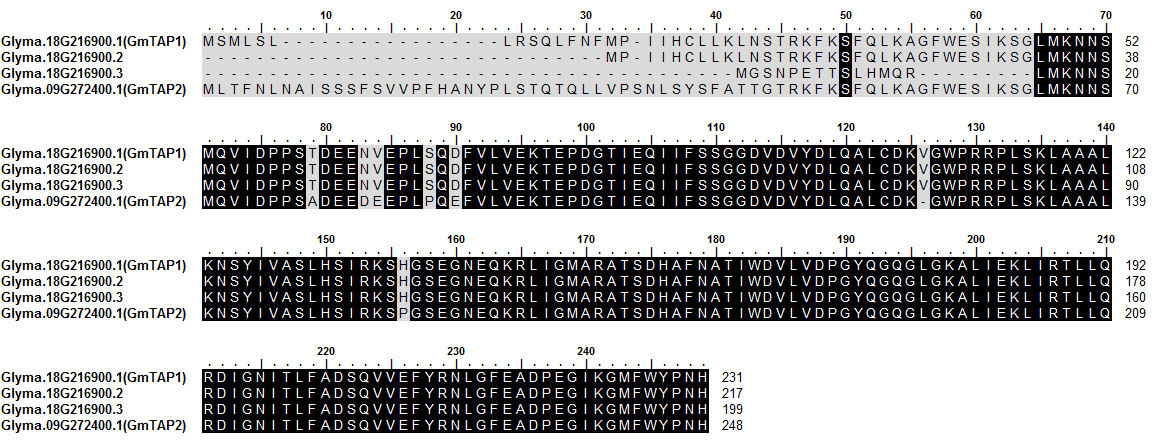

Supplement: supp [file elife-40039-supp-v1.zip › elife_poa_e40039_Figure_2_figure_supplement_1.tif]

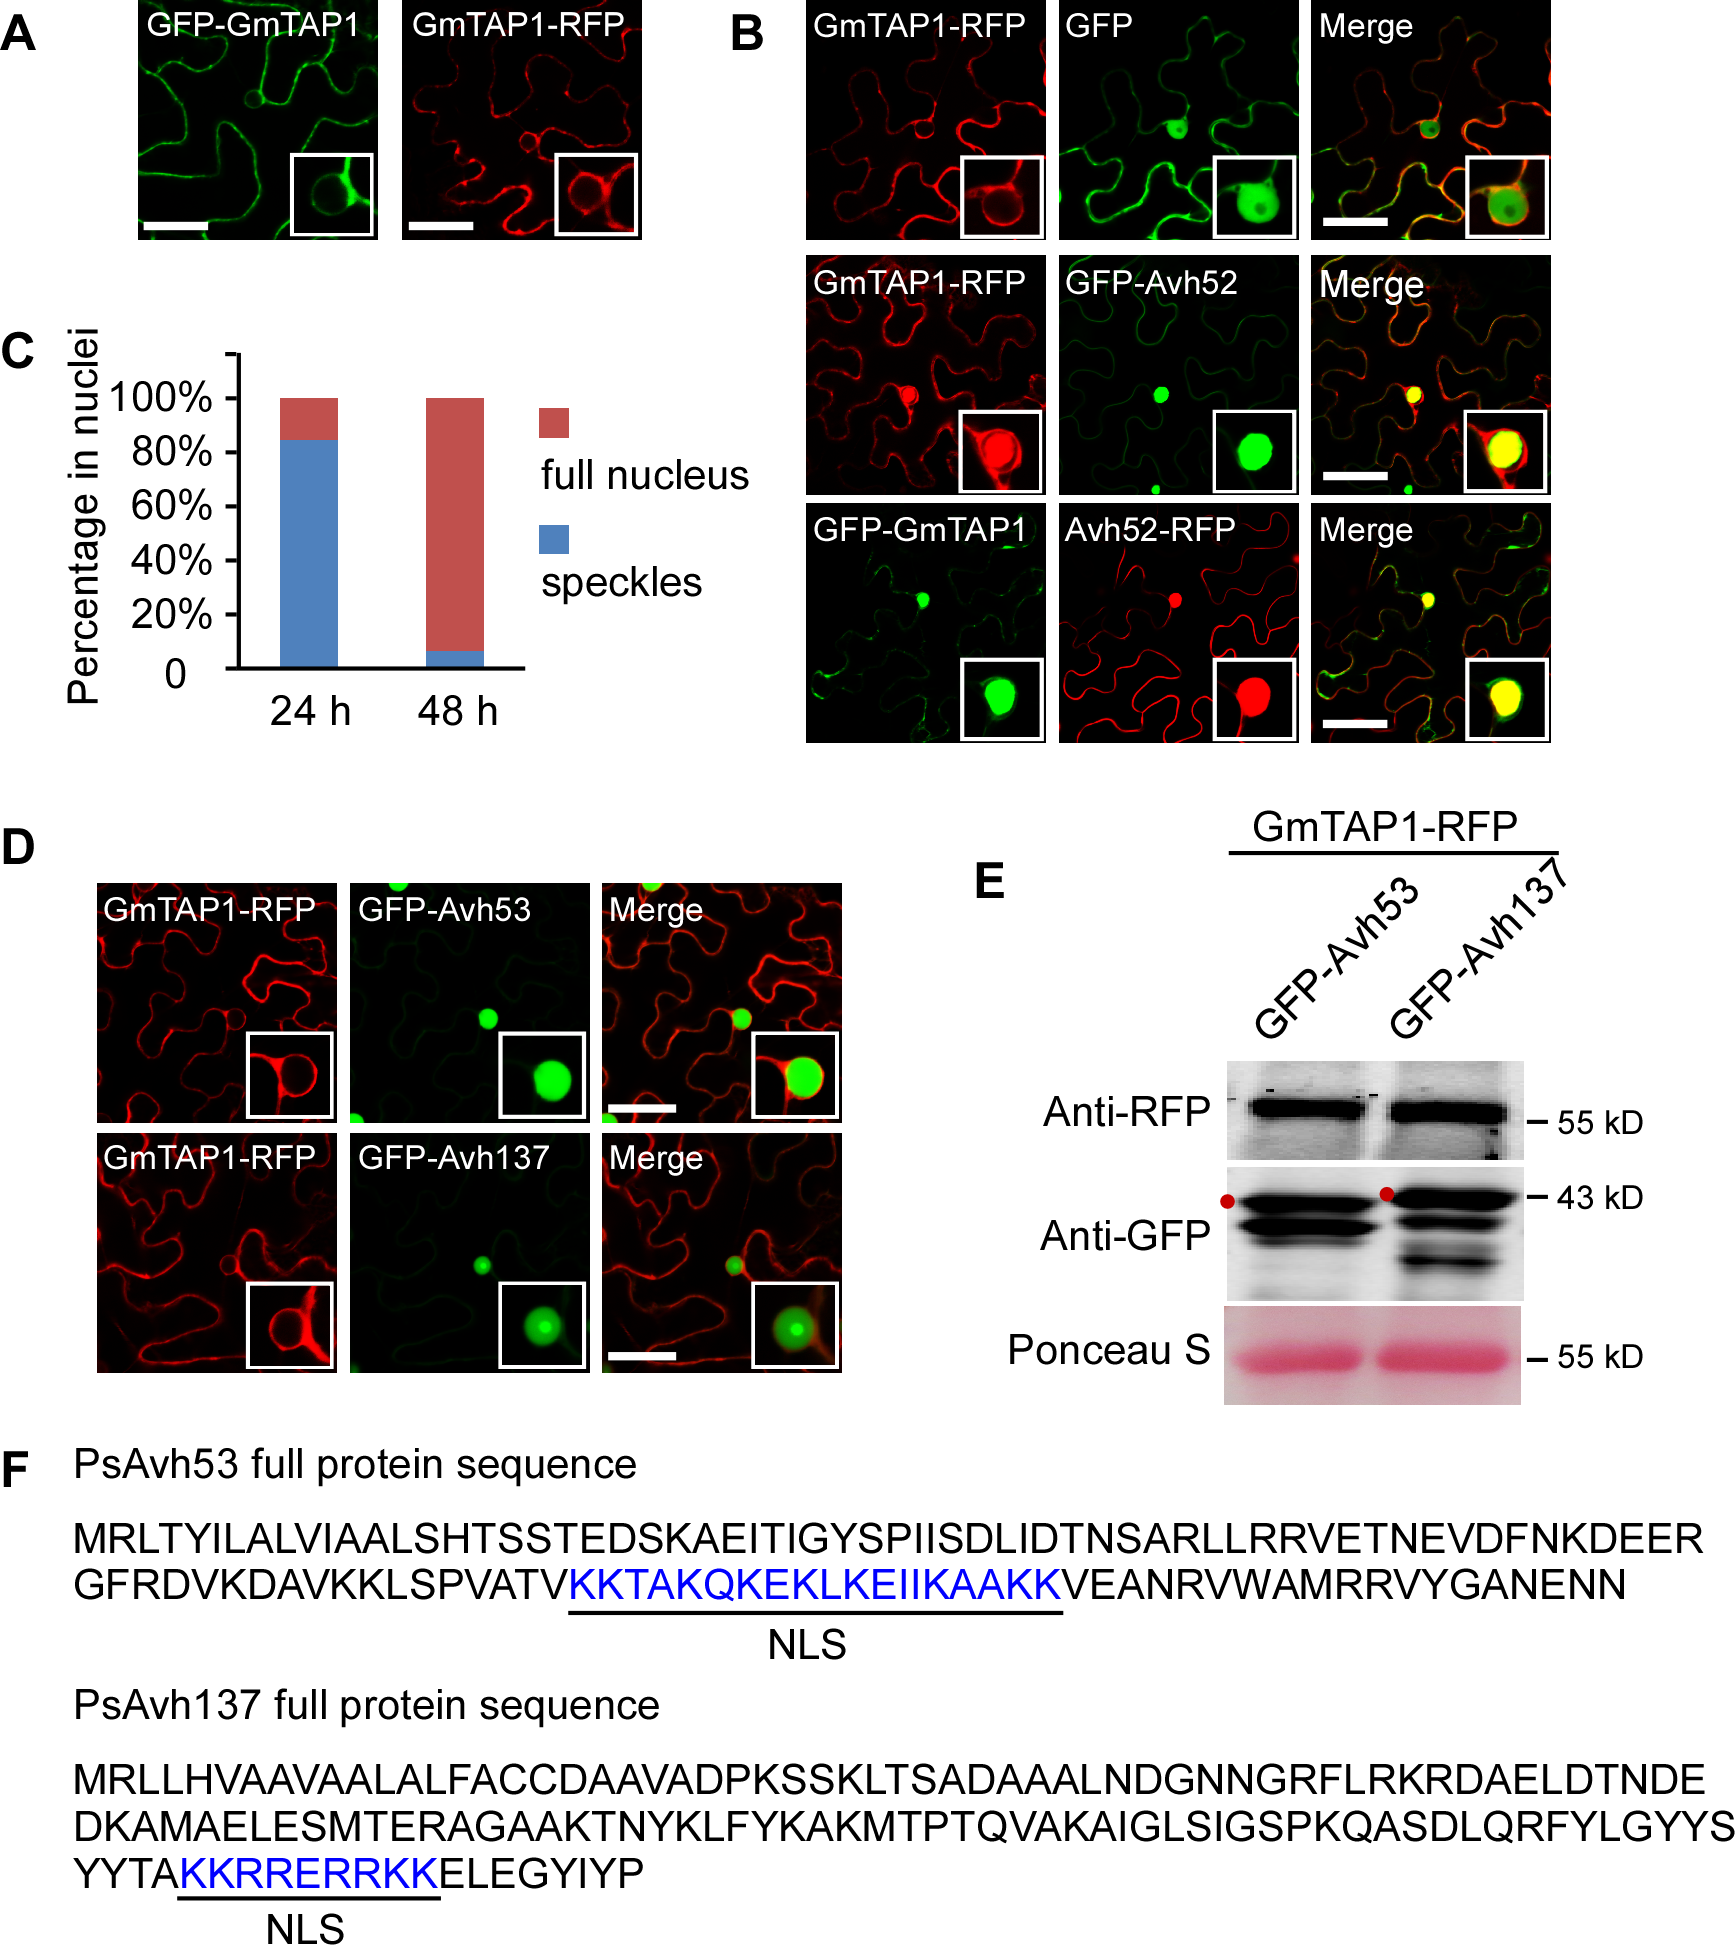

Supplement: supp [file elife-40039-supp-v1.zip › elife_poa_e40039_Figure_3_figure_supplement_1.tif]

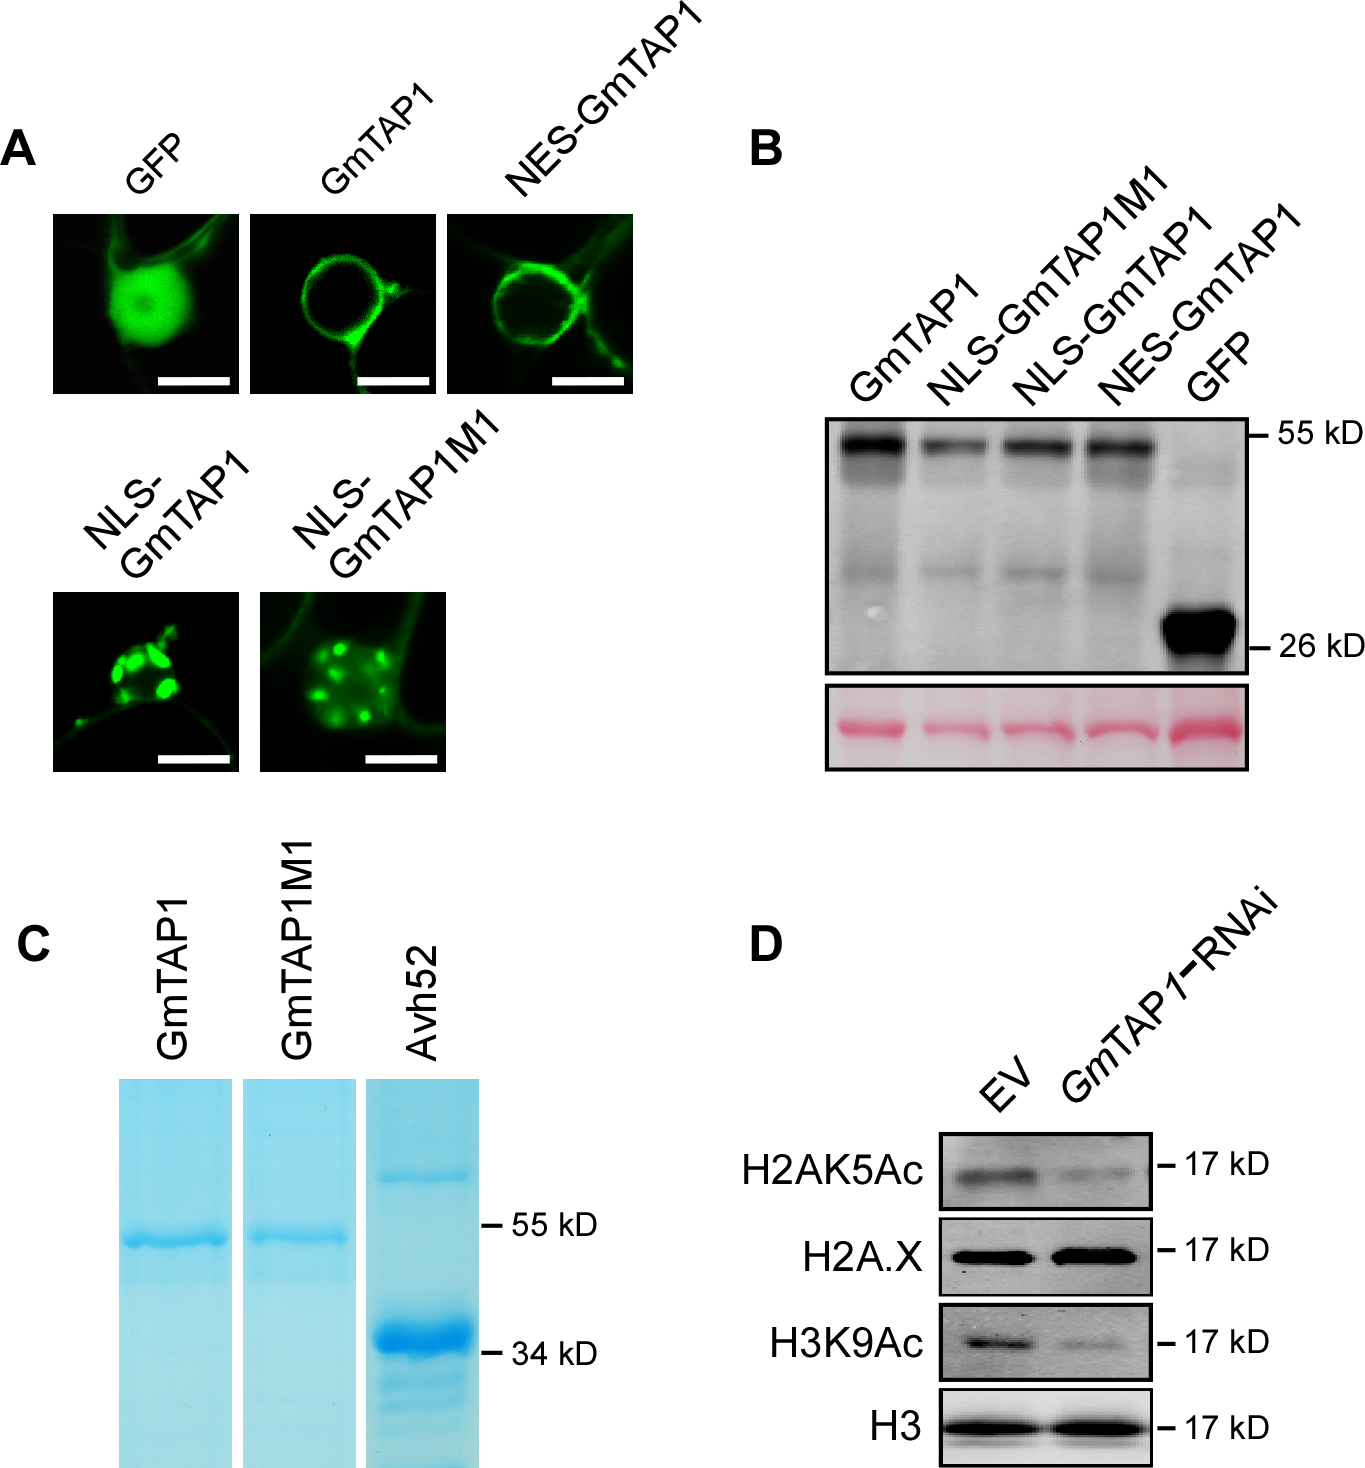

Supplement: supp [file elife-40039-supp-v1.zip › elife_poa_e40039_Figure_5_figure_supplement_1.tif]

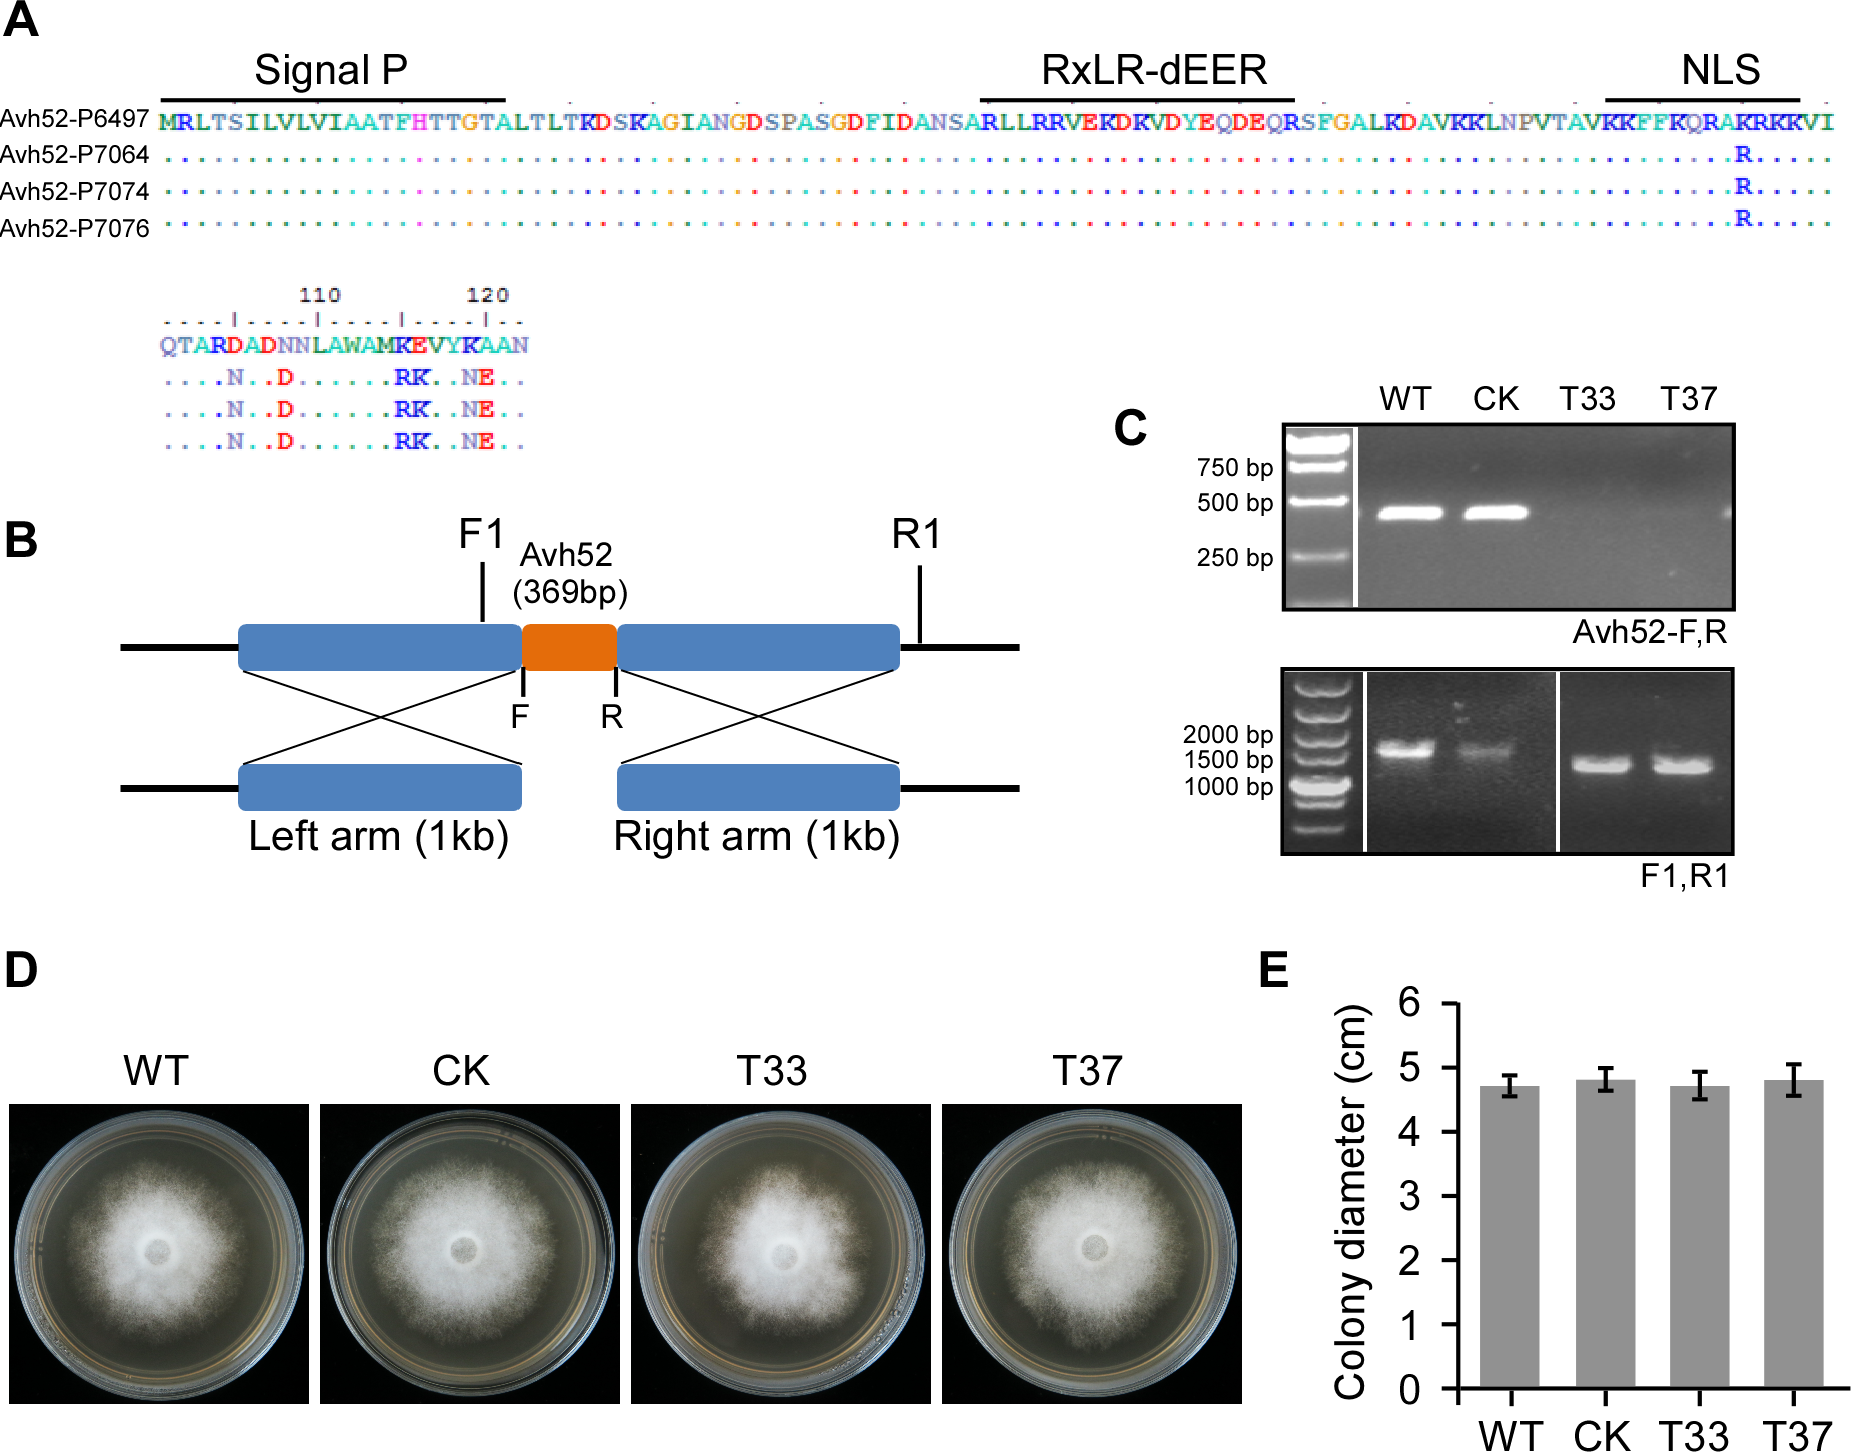

Supplement: supp [file elife-40039-supp-v1.zip › elife_poa_e40039_Figure_1_figure_supplement_1.tif]

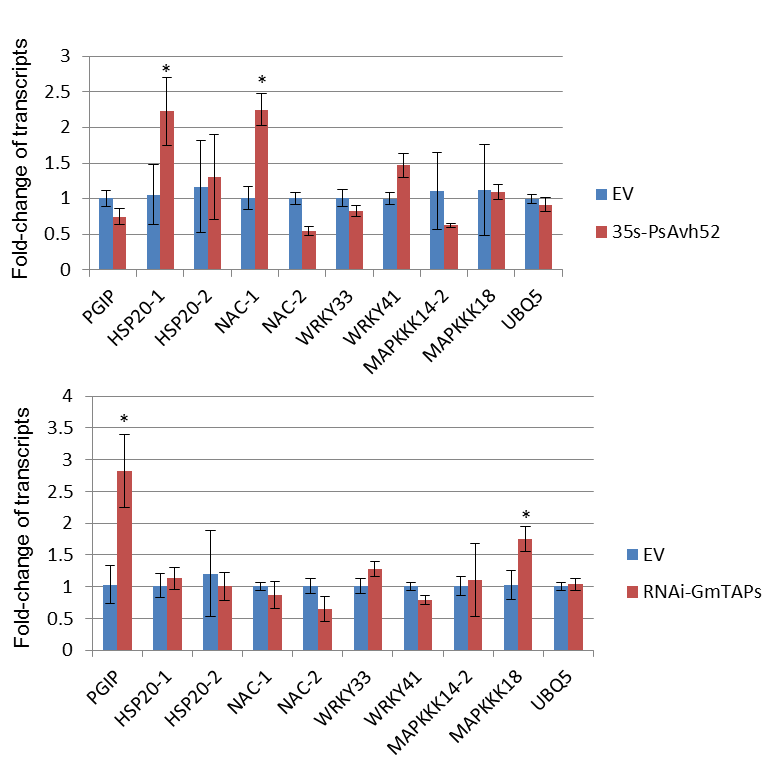

Supplement: supp [file elife-40039-supp-v1.zip › elife_poa_e40039_Figure_6_figure_supplement_2.png]

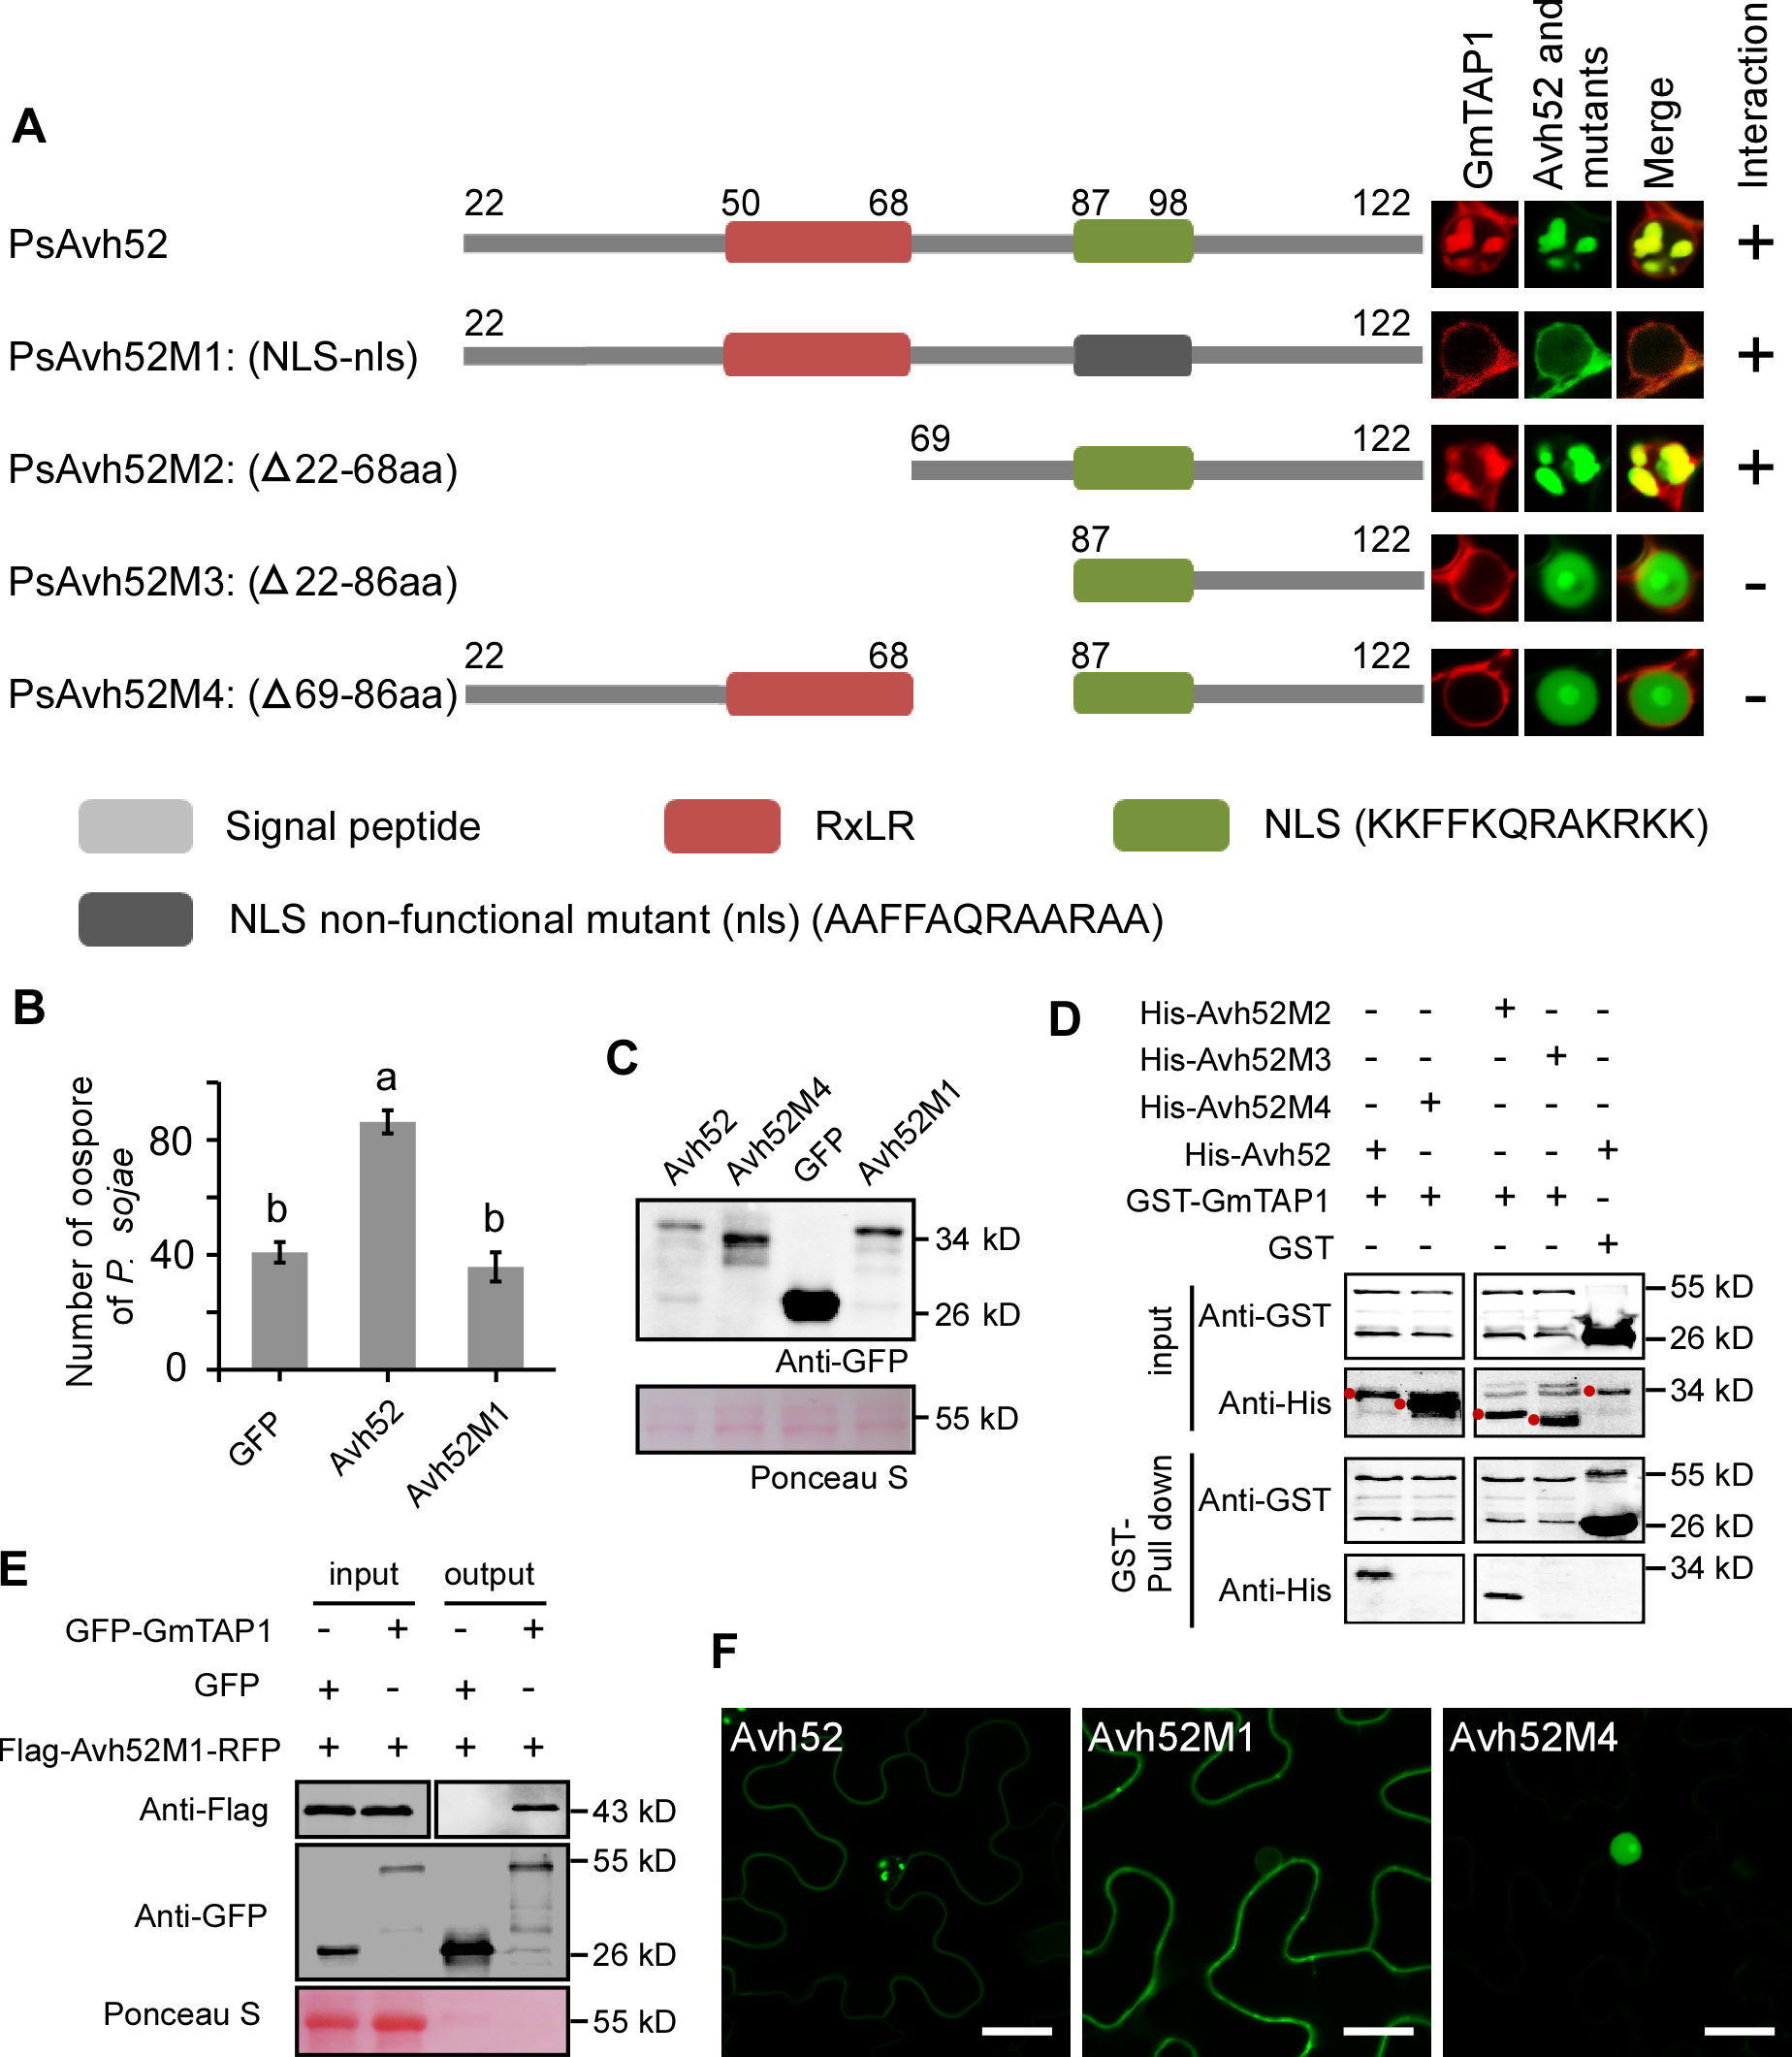

Supplement: supp [file elife-40039-supp-v1.zip › elife_poa_e40039_Figure_2_figure_supplement_2.tif]
